# Supplementary material for: Monogenic diabetes clinic (MDC): 3-year experience
Source: PubMed Central journal article supplement (PMC9813184; doi:10.1007/s00592-022-01972-2), 2022-09-30
Supplement: 592_2022_1972_MOESM1_ESM.pdf [file 592_2022_1972_MOESM1_ESM.pdf]

- KCNJ11
- ABCC8
- VUS (Not causative)
- PDX1
- 6q24
- negative

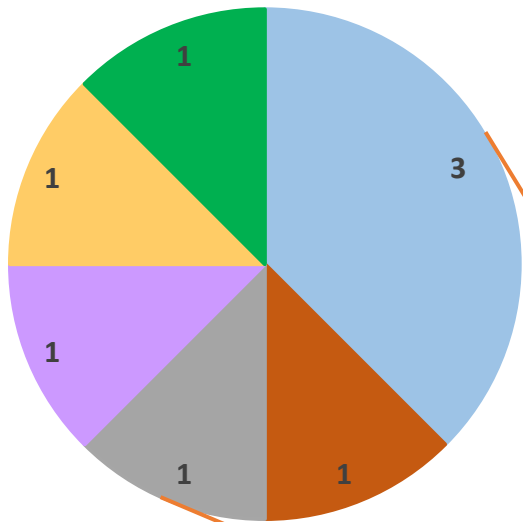

- Diabetes
  - IFG/IGT
  - GCK
  - HNF1a
  - Other
  - INSR
  - variant of undetermined effect
- } **NEGATIVE**

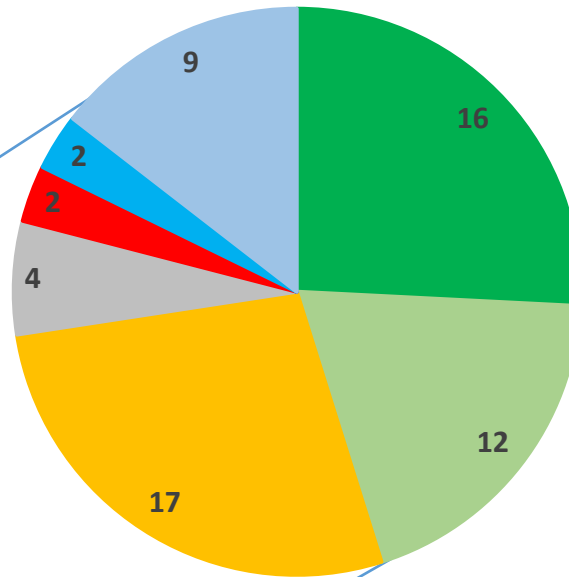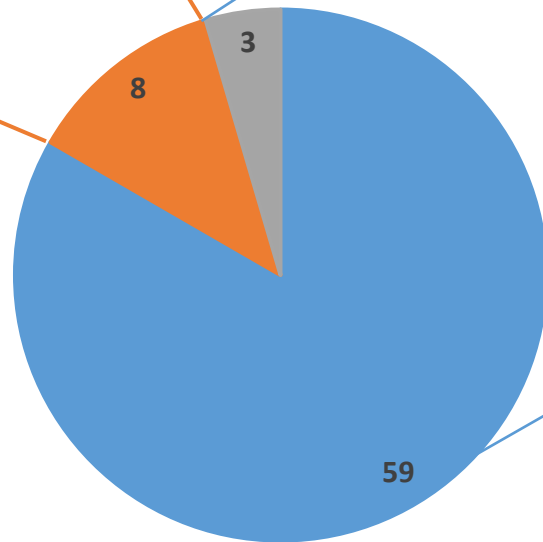

- MODY
- NDM
- Type A SIR
